# Supplementary material for: In situ preparation of a La1.2Sr0.8Mn0.4Fe0.6O4 Ruddlesden–Popper phase with exsolved Fe nanoparticles as an anode for SOFCs
Source: Royal Society of Chemistry journal article supplement (doi:10.1039/c6ta09692a), 2017-01-01
Supplement: c6ta09692a1.pdf [file c6ta09692a1.pdf]

## **Electronic Supplementary Information**

### *In-Situ* Preparation of $\text{La}_{1.2}\text{Sr}_{0.8}\text{Mn}_{0.4}\text{Fe}_{0.6}\text{O}_4$ Ruddlesden-Popper Phase with Exsolved Fe Nanoparticles as Anode for SOFC

Yong Sik Chung,<sup>a</sup> Taewook Kim,<sup>a</sup> Tae Ho Shin,<sup>\*b</sup> Heechul Yoon,<sup>a</sup> Seongmin Park,<sup>a</sup> Nigel Mark Sammes,<sup>a</sup>  
Won Bae Kim,<sup>a</sup> Jong Shik Chung<sup>\*a</sup>

<sup>a</sup>. Department of Chemical Engineering, Pohang University of Science and Technology (POSTECH), 77  
Chungam-Ro Pohang 37673, Republic of Korea

<sup>b</sup>. Korea Institute of Ceramic Engineering and Technology (KICET), 101 Soho-RO Jinju-si 52851, Republic of  
Korea

\*E-mail: [jsc@postech.ac.kr](mailto:jsc@postech.ac.kr) (J. S. Chung) / [ths@kicet.re.kr](mailto:ths@kicet.re.kr)

### **Contents**

**Figure S1.** XRD Pattern of the fresh  $\text{La}_{0.6}\text{Sr}_{0.4}\text{FeO}_3$  (LSF) and its phase stability in reducing  
condition of 20 %  $\text{H}_2/\text{N}_2$  at 1073 K for 10 h

**Figure S2.** Oxygen nonstoichiometry of pre-reduced RPLSMF against temperature in 5 %  $\text{H}_2/\text{N}_2$   
atmosphere.

**Figure S3.** XRD Patterns of the LSMF perovskite exposed to reducing condition of 20 %  $\text{H}_2/\text{N}_2$  at  
different temperatures (773 – 973 K)

**Figure S4.** Power density change of a single cell with RPLSMF and RPLSMF/GDC composite  
anode containing Fe nanoparticles, in  $\text{H}_2$  at 1073 K under constant voltage of 0.7 V

**Figure S5.** XRD pattern of the fresh  $\text{La}_{0.6}\text{Sr}_{0.4}\text{Mn}_{0.6}\text{Fe}_{0.4}\text{O}_3$  (LSMF64) and its phase stability in  
reducing condition of 20 %  $\text{H}_2/\text{N}_2$  at 1073 K for 10 h

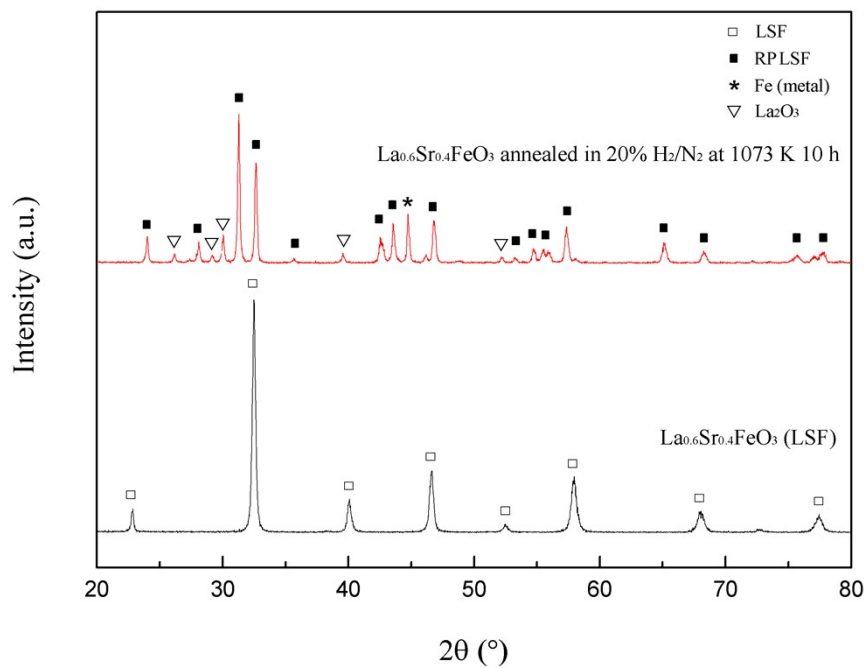

**Figure S1.** XRD Pattern of the fresh  $\text{La}_{0.6}\text{Sr}_{0.4}\text{FeO}_3$  (LSF) and its phase stability in reducing condition of 20 %  $\text{H}_2/\text{N}_2$  at 1073 K for 10 h

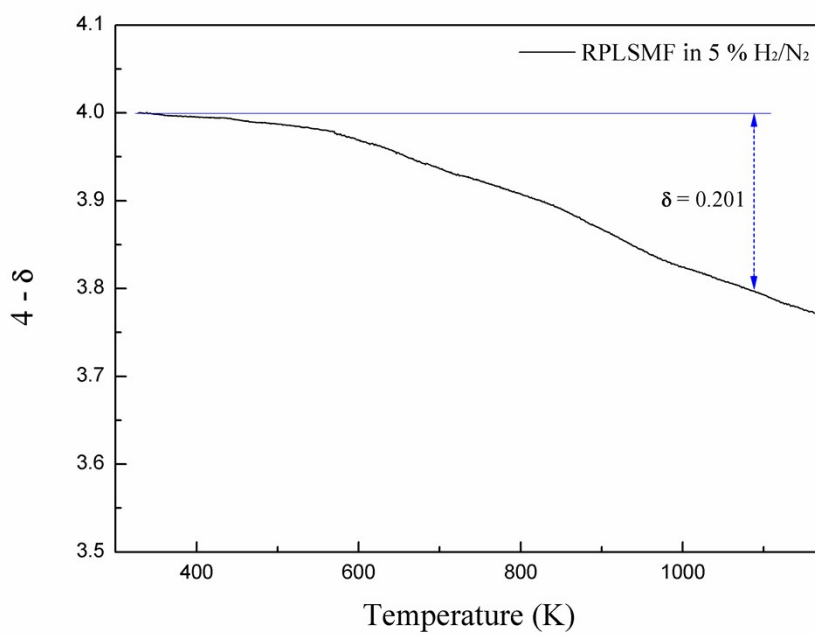

**Figure S2.** Oxygen nonstoichiometry of pre-reduced RPLSMF against temperature in 5 %  $\text{H}_2/\text{N}_2$  atmosphere.

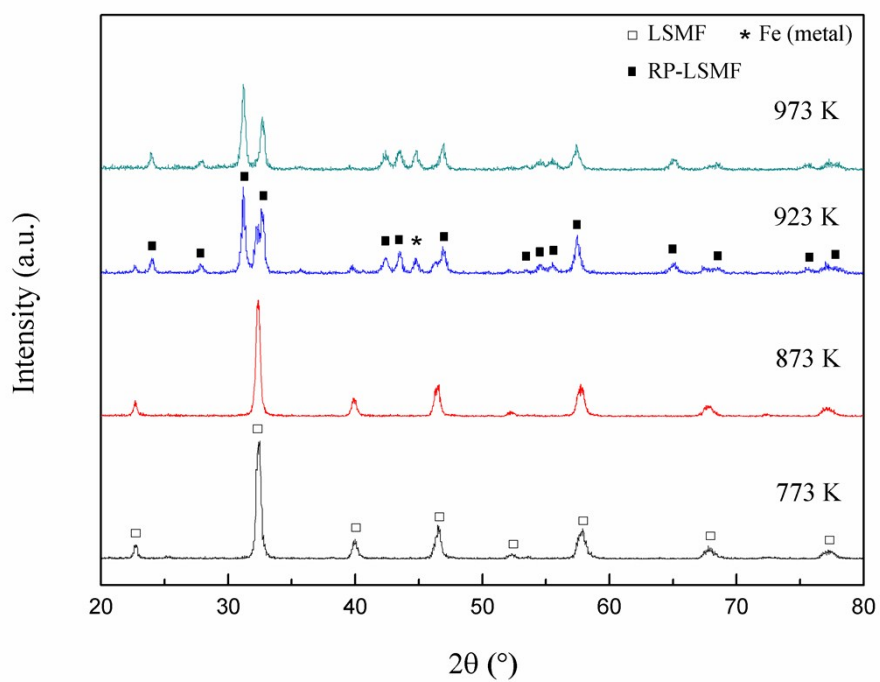

**Figure S3.** XRD Patterns of the LSMF perovskite exposed to reducing condition of 20 % H<sub>2</sub>/N<sub>2</sub> at different temperatures (773 – 973 K)

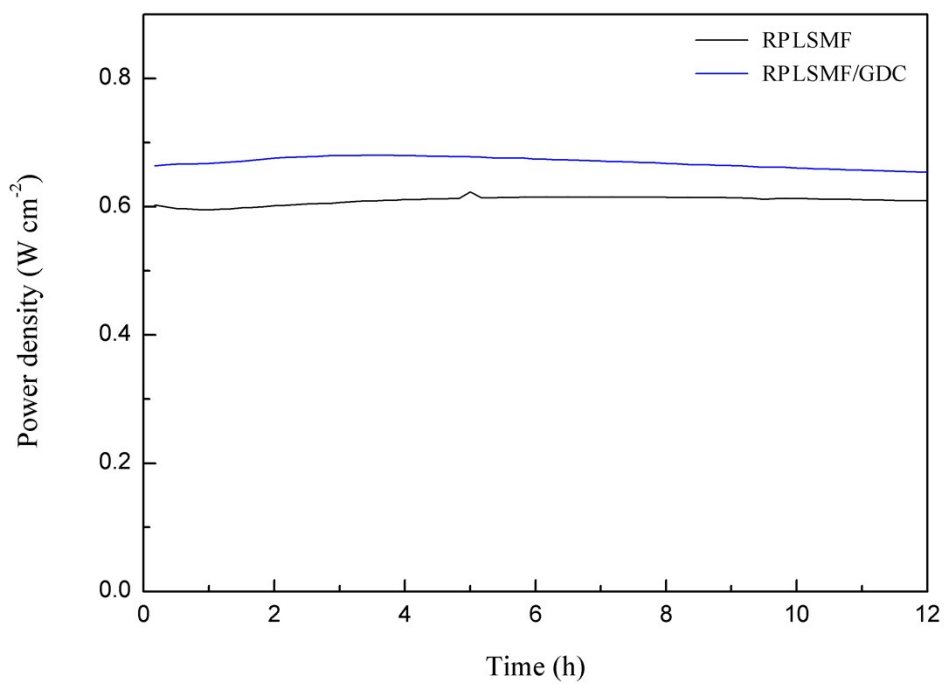

**Figure S4.** Power density change of a single cell with RPLSMF and RPLSMF/GDC composite anode containing Fe nanoparticles, in H<sub>2</sub> at 1073 K under constant voltage of 0.7 V

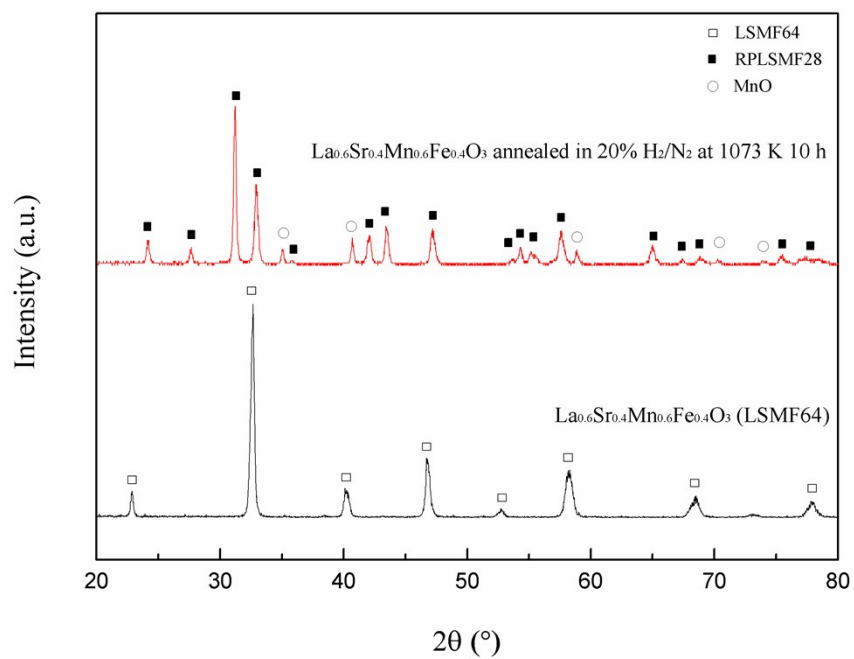

**Figure S5.** XRD pattern of the fresh La<sub>0.6</sub>Sr<sub>0.4</sub>Mn<sub>0.6</sub>Fe<sub>0.4</sub>O<sub>3</sub> (LSMF64) and its phase stability in reducing condition of 20 % H<sub>2</sub>/N<sub>2</sub> at 1073 K for 10 h
